# Supplementary material for: Peptide bond formation by aminolysin-A catalysis: A simple approach to enzymatic synthesis of diverse short oligopeptides and biologically active puromycins
Source: Royal Society of Chemistry journal article supplement (doi:10.1039/c0ob00403k), 2011-01-01
Supplement: c0ob00403k.pdf [file c0ob00403k.pdf]

# Electronic Supplementary Information

## Peptide Bond Formation by Aminolysin-A Catalysis: A Simple Approach to Enzymatic Synthesis of Diverse Short Oligopeptides and Biologically Active Puromycins

Hirokazu Usuki, Yukihiro Yamamoto, Jiro Arima, Masaki Iwabuchi, Shozo Miyoshi, Teruhiko Nitoda,  
and Tadashi Hatanaka\*

E-mail: hatanaka@bio-ribs.com

### Contents

1. List of family S9 peptidases used for the construction of an unrooted dendrogram (Figure 1 of the main text).
2. Enzymatic characteristics of wild type S9-ACAP.
3. MS spectra of synthesized homo-peptides shown in Figure 3[A] of the main text.
4. Homo-peptide synthesis
5. Confirmation of non-enzymatic cyclization of  $D$ -F- $D$ -F-OBn to give *cyclo*( $D$ -F- $D$ -F)
6. Hetero-peptide synthesis
7. Puromycin analogue synthesis
  - 7-1. MS/MS analysis of synthesized puromycin analogues (X-PANs) and authentic puromycin (Figure 4 of the main text)
  - 7-2: MRM quantification of synthesized puromycin analogues (X-PANs) as a substitute for authentic puromycin (Table 1, 2, figure 4, and 5 of main text)

Section-1. List of family S9 peptidases used for the construction of an unrooted dendrogram (Figure 1 of the main text).

Table S1. Family S9 enzymes from different species used for the construction of phylogenetic trees

| Entry                                     | Species                                 | Domain of life | AccessionNO             | Subfamily |
|-------------------------------------------|-----------------------------------------|----------------|-------------------------|-----------|
| 1                                         | <i>Leishmania major</i>                 | Eukarya        | CAJ02700.1              | S9A       |
| 2                                         | <i>Trypanosoma cruzi</i>                | Eukarya        | EAN84486.1              | S9A       |
| 3                                         | <i>T. brucei</i>                        | Eukarya        | EAN80234.1              | S9A       |
| 4                                         | <i>Mycobacterium leprae</i>             | Bacteria       | CAB08412                | S9A       |
| 5                                         | <i>M. tuberculosis H37Rv</i>            | Bacteria       | CAB02371                | S9A       |
| 6                                         | <i>M. lacunata</i>                      | Bacteria       | BAA07460                | S9A       |
| 7                                         | <i>T. denticola</i>                     | Eukarya        | AAK39550                | S9A       |
| 8                                         | <i>Estercia coli</i>                    | Bacteria       | BAA01750                | S9A       |
| 9                                         | <i>Pyrococcus furiosus</i>              | Archaea        | AAA73423                | S9A       |
| 10                                        | <i>Streptomyces griseus</i>             | bacteria       | B1VWJ6                  | S9A       |
| 11                                        | <i>Aeromonas hydrophila</i>             | Bacteria       | BAA03105                | S9A       |
| 12                                        | <i>Elizabethkingia meningoseptica</i>   | Bacteria       | BAA01755                | S9A       |
| 13                                        | <i>Sphingomonas capsulata</i>           | Bacteria       | BAA34052                | S9A       |
| 14                                        | <i>Arabidopsis thalian</i>              | Eukaryota      | NP_001117606            | S9A       |
| 15                                        | <i>Arabidopsis thalian</i>              | Eukaryota      | Q9LN30                  | S9A       |
| 16                                        | Porcine                                 | Eukaryota      | AAA31110                | S9A       |
| 17                                        | <i>Arabidopsis thaliana</i>             | Eukaryota      | Q9FNF6                  | S9B       |
| 18                                        | <i>Drosophila melanogaster</i>          | Eukaryota      | Q9VC19                  | S9B       |
| 19                                        | Homo sapiens                            | Eukaryota      | EAW77731                | S9B       |
| 20                                        | Homo sapiens                            | Eukaryota      | EAW69199                | S9B       |
| 21                                        | <i>Porphyromonas gingivalis</i>         | Bacteria       | MER005196 <sup>1)</sup> | S9B       |
| 22                                        | <i>Pseudomonas sp. WO24</i>             | Bacteria       | BAD27580                | S9B       |
| 23                                        | <i>Chryseobacterium meningosepticum</i> | Bacteria       | Q47900                  | S9B       |
| 24                                        | <i>Aspergillus oryzae</i>               | Eukaryota      | O42812                  | S9B       |
| 25                                        | <i>Saccharomyces cerevisiae</i>         | Eukaryota      | P18962                  | S9B       |
| 26                                        | <i>Saccharomyces cerevisiae</i>         | Eukaryota      | P33894                  | S9B       |
| 27                                        | Homo sapiens                            | Eukaryota      | P27487                  | S9B       |
| 28                                        | Homo sapiens                            | Eukaryota      | Q12884                  | S9B       |
| 29                                        | <i>Acidothermus cellulolyticus</i>      | Bacteria       | YP_873767               | S9C       |
| 30                                        | <i>Streptomyces avermitilis</i>         | Bacteria       | NP_825741               | S9C       |
| 31                                        | <i>Streptomyces coelicolor</i>          | Bacteria       | Q9XAJ2                  | S9C       |
| 32                                        | <i>Arabidopsis thaliana</i>             | Eukaryota      | Q84LM4                  | S9C       |
| 33                                        | <i>Oryza sativa</i>                     | Eukaryota      | A3C4R4                  | S9C       |
| 34                                        | <i>Oryza sativa</i>                     | Eukaryota      | ABB47613                | S9C       |
| 35                                        | <i>Nematostella vectensis</i>           | Eukaryota      | EDO40564                | S9C       |
| 36                                        | <i>Sus scrofa</i>                       | Eukaryota      | P19205                  | S9C       |
| 37                                        | Homo sapiens                            | Eukaryota      | P13798                  | S9C       |
| <i>S. morookaensis</i> , PMH              | <i>Streptomyces morookaensis</i>        | Bacteria       | BAE79346                | unknown   |
| <i>S. coelicolor</i> , AP                 | <i>S. coelicolor</i>                    | Bacteria       | Q9ZBI6                  | unknown   |
| <i>S. griseus</i> , AP                    | <i>S. griseus</i>                       | Bacteria       | SGRI1153 <sup>2)</sup>  | unknown   |
| <i>S. thermocyaneoviolaceus</i> , AP      | <i>S. thermocyaneoviolaceus</i>         | Bacteria       | AB480284                | unknown   |
| <i>A. cellulolyticus</i> , AP (This work) | <i>Acidothermus cellulolyticus</i>      | Bacteria       | YP_873247               | unknown   |

1) ID of MEROPS data base (<http://merops.sanger.ac.uk/>), 2) ID of *Streptomyces griseus* genome project (<http://streptomyces.nih.go.jp/griseus/>)

The purified enzyme was used for these experiments. The standard assays were performed as follows: 10  $\mu$ l of the enzyme solution was added to the 2 mM L leucine paranitroanilide. (Leu-*p*NA) in 12.5 mM Mes/NaOH buffer (pH 6.4) which contain 10% (v/v) DMSO. Enzyme reaction was carried out at 37 °C for 1 to 5 min. The increase in absorbance at 405 nm attributable to release of *p*-nitroaniline was monitored continuously using a microplate reader (SH-8000 Lab; CORONA ELECTRIC Co.,Ltd.). The initial rates of the hydrolytic activity were determined from the linear portion of the optical density profile.

The optimum pH of enzyme activities was tested in a four-component buffer, which consisted of 5 mM glycine, 5 mM acetic acid, 5 mM Mes, and 15 mM Tris. The buffer was titrated to the desired pH with HCl or NaOH. In the assays, Leu-*p*NA at 100  $\mu$ M was used as substrate. Thermal stability testing was carried out as follows: the enzyme solutions were incubated at various temperatures (20–75°C) for 30 min at pH 6.4. Then, their residual activity toward Leu-*p*NA were measured. The substrate specificity toward *p*NA derivative of amino acids were tested at pH 6.4 and at pH 7.5 in the above fore-component buffer system. The kinetic parameters ( $K_{cat}$  and  $K_m$ ) against Leu-*p*NA was determined by the Lineweaver-Burk plot.

The hydrolytic activity toward puromycin was evaluated by the LC/UV method described as follows. The reaction mixture (50  $\mu$ L) was composed of 12.5 mM Mes/NaOH buffer (pH 6.4), 2.0 mM puromycin, and 4.7  $\mu$ g of purified ACAP. The enzyme reaction was conducted at 37 °C for 60 min followed by the addition of 100  $\mu$ L of 3% (v/v) HCOOH for quenching the reaction. The solution was centrifuged and 10  $\mu$ l of the supernatant was applied to ODS-HPLC analysis monitored at UV 270 nm. The mobile phase was water containing 0.1 % (v/v) HCOOH (A) and MeOH containing 0.1 % (v/v) HCOOH (B) at a flow rate of 0.2 mL/ min. The LC condition was 15% B during 0–5 min and a linear increase from 15–60 % B during 5–30 min. Under these conditions, the PM substrate and its hydrolyzed product PAN were eluted at 22.6 min and 5.1 min, respectively.

**TableS2. Biochemical properties of ACAP**

| Properties                                              | Supporting information |           |
|---------------------------------------------------------|------------------------|-----------|
| Molecular mass (kDa)                                    | 69.8                   |           |
| Catalytic Ser                                           | Ser <sup>491</sup>     |           |
| Optimum pH                                              | 6.4                    | Figure S1 |
| Thermal stability (°C)                                  | < 65 <sup>1)</sup>     | Figure S2 |
| Optimum temperature                                     | 65                     | Figure S3 |
| Inhibitor <sup>2)</sup>                                 | PMSF                   |           |
| Hydrolytic activity (μmol/min/mg)                       |                        |           |
| Substrates                                              |                        |           |
| Leu- <i>p</i> NA (2.0 mM) <sup>3)</sup>                 | 105 (±0.65)            | Figure S4 |
| Phe- <i>p</i> NA (1.0 mM) <sup>3)</sup>                 | 57.1 (±0.01)           | Figure S4 |
| Met- <i>p</i> NA (2.0 mM) <sup>3)</sup>                 | 44.2 (±1.18)           | Figure S4 |
| Pro- <i>p</i> NA (2.0 mM) <sup>3)</sup>                 | 9.55 (±0.09)           | Figure S4 |
| Phe-NH <sub>2</sub> (5.0 mM) <sup>4)</sup>              | 23.9 (±1.15)           |           |
| Phe-Phe-NH <sub>2</sub> (5.0 mM) <sup>4)</sup>          | 18.7 (±0.96)           |           |
| Phe-Phe (5.0 mM) <sup>4)</sup>                          | 16.0 (±1.47)           |           |
| Phe-Ala (5.0 mM) <sup>4)</sup>                          | 2.85 (±0.19)           |           |
| Leu-Phe (5.0 mM) <sup>4)</sup>                          | 2.30 (±0.87)           |           |
| Phe-OMe (10.0 mM) <sup>4)</sup>                         | 30.7 (±2.18)           |           |
| Puromycin (2.0 mM) <sup>5)</sup>                        | 0.124 (±0.01)          |           |
| <i>K<sub>m</sub></i> (mM) <sup>6)</sup>                 | 0.693 (±0.05)          | Figure S5 |
| <i>K<sub>cat</sub></i> (s <sup>-1</sup> ) <sup>6)</sup> | 154 (±1.90)            | Figure S5 |

1) Approximately 80% of enzyme activity remained after heat treatment at 65 °C for 30 min. In addition, as shown in Figure S2, activity-enhancement was observed by heat treatment at around 60 °C for 30 min. For this experiment, Leu-*p*NA was used as substrate. 2) 100 μl (0.1 mg/ml) of enzyme solution was treated with 2.0 mM phenylmethylsulfonyl fluoride (PMSF) at 30 °C for 30 min, after which the residual activity toward 2mM Leu-*p*NA was measured. The residual activity was 47.3%. 3) At pH 6.4 in 12.5 mM Mes/NaOH buffer containing 10 % (v/v) DMSO. 4) At pH 5.5 in 80 mM AcOH/NaOH buffer. 5) At pH 6.4 in 12.5 mM Mes/NaOH buffer without DMSO. 6) Toward Leu-*p*NA at pH 6.4 in 12.5 mM Mes/NaOH buffer.

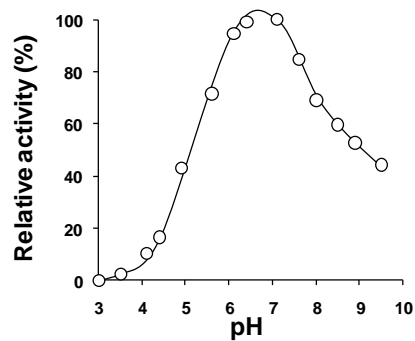

Figure S1. Optimum pH of ACAP for Leu-pNA hydrolysis

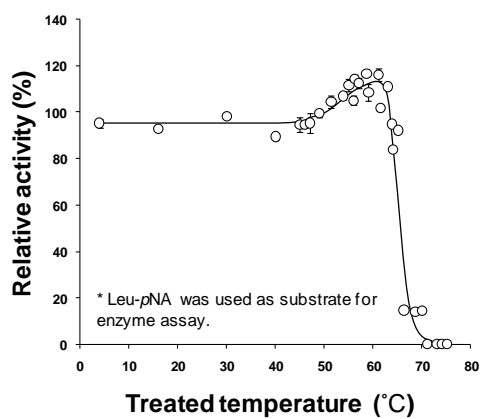

Figure S2. Thermal stability of ACAP

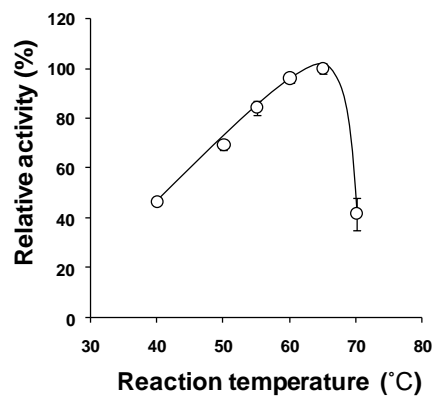

Figure S3. Optimum temperature of ACAP for Leu-pNA hydrolysis

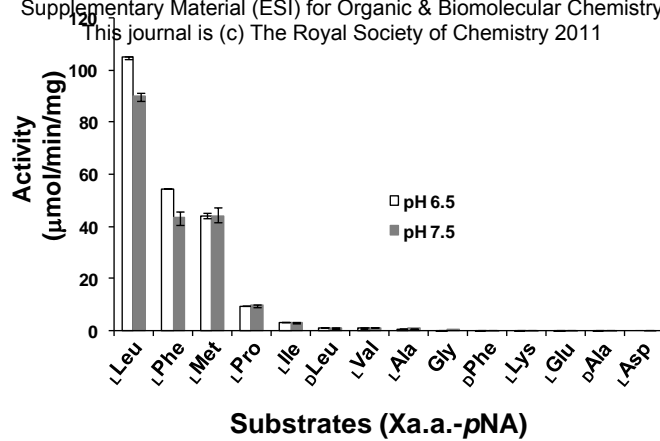

Figure S4. Aminopeptidase activity of ACAP toward pNA derivatives of amino acids.

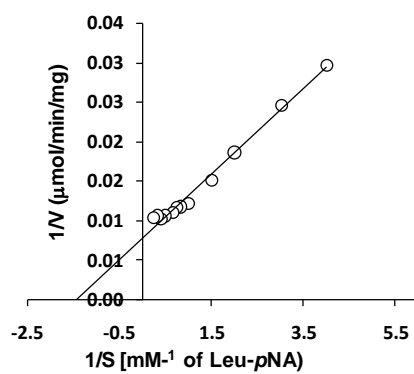

Figure S5. Lineweaver burk plot

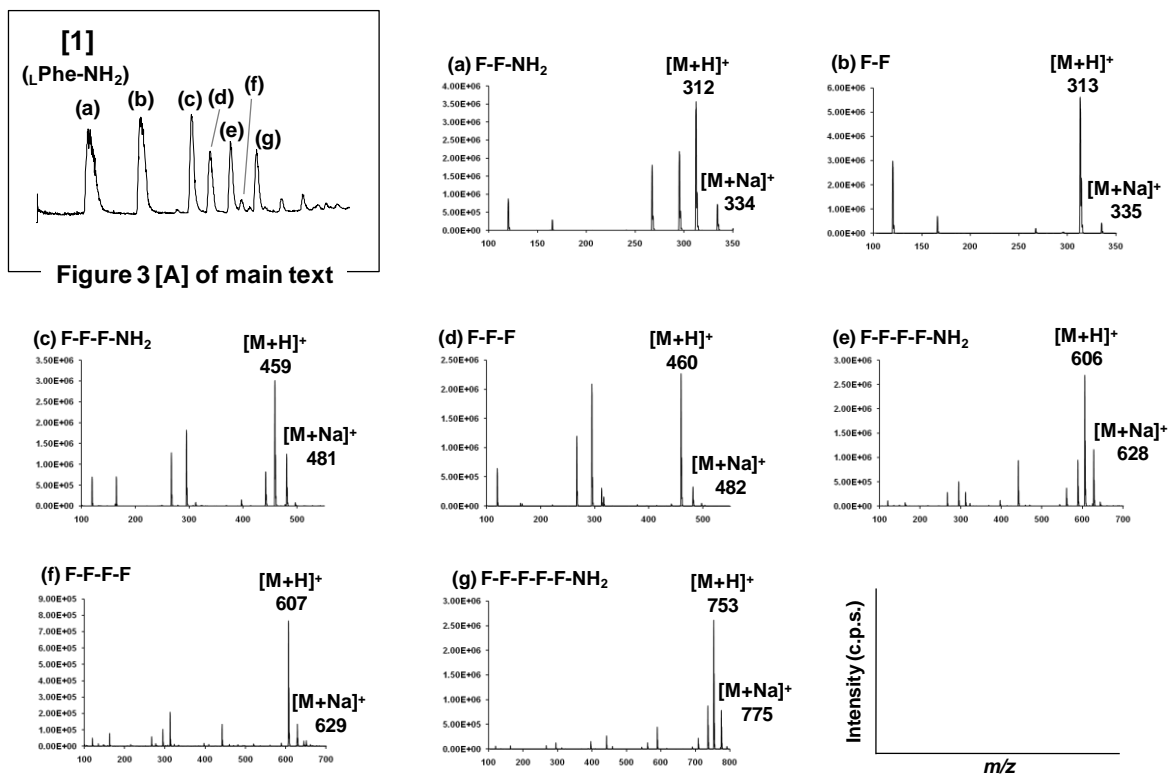

Figure S6-1. MS spectra of produced homo-peptides shown in Figure 3 [A] of main text.

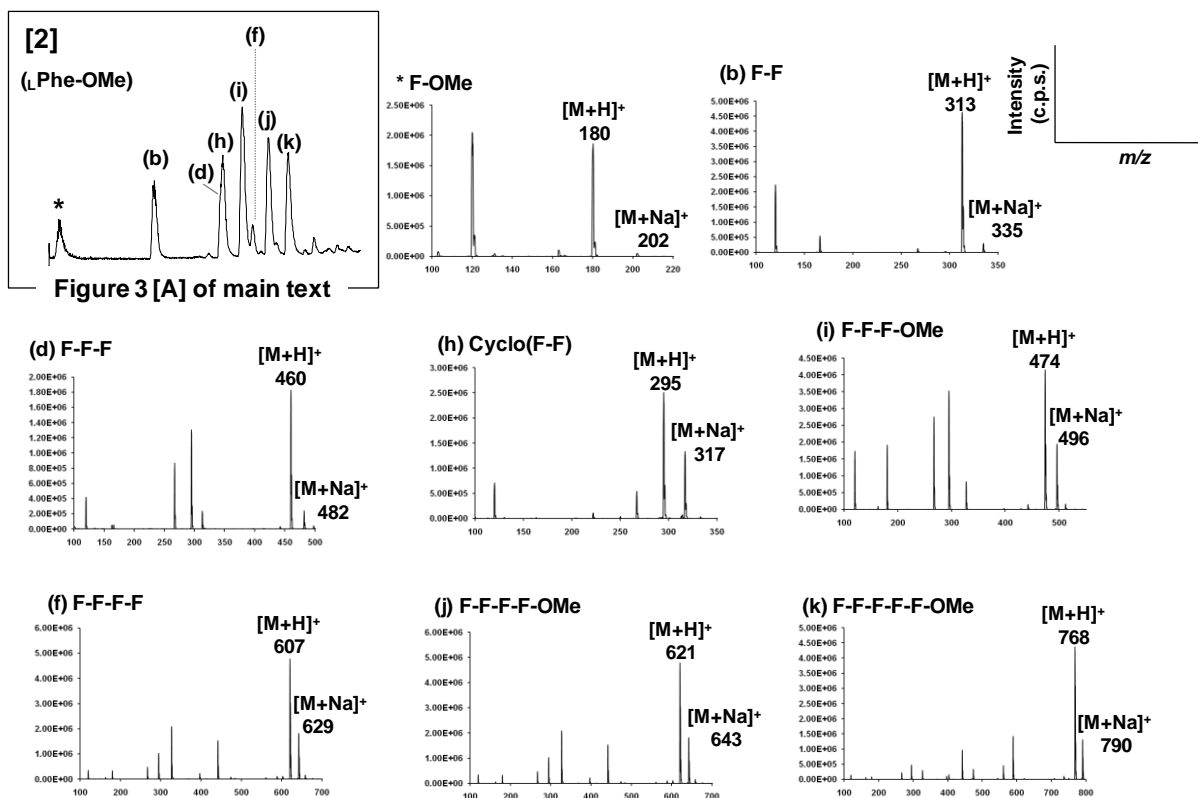

Figure S6-2. MS spectra of produced homo-peptides shown in Figure 3 [A] of main text.

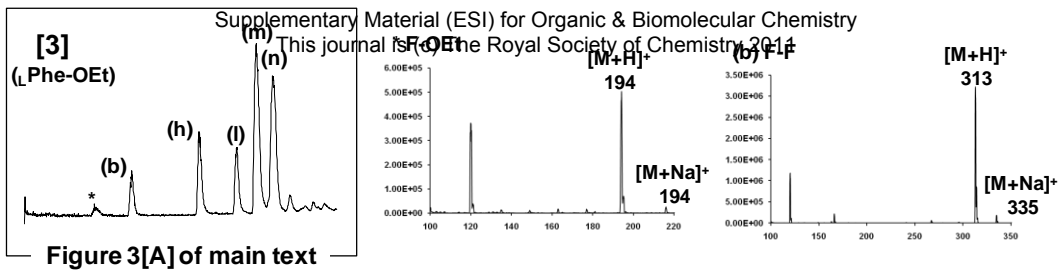

Figure S6-3. MS spectra of produced homo-peptides shown in Figure 3[A] of main text.

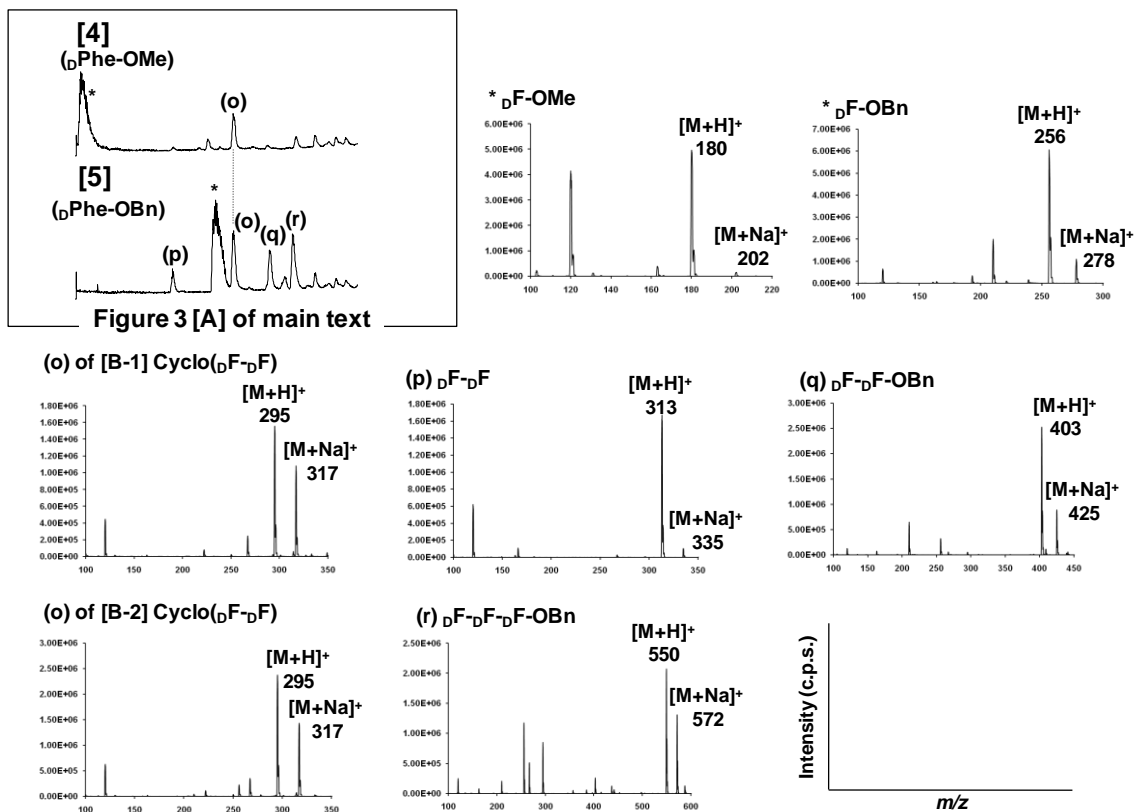

Figure S6-4. MS spectra of produced homo-peptides shown in Figure 3 [A] of main text.



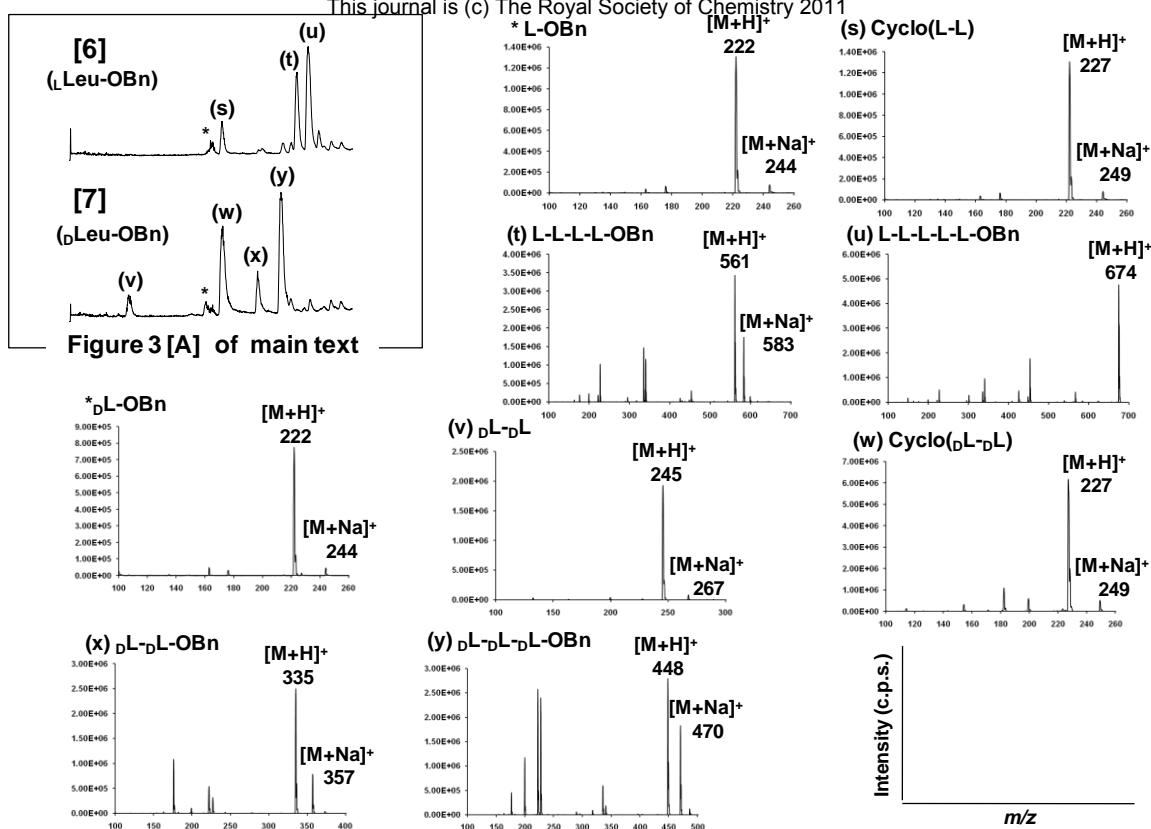

Figure S6-5. MS spectra of produced homo-peptides shown in Figure 3 [A] of main text.

#### Section-4. Homo-peptide synthesis

The procedure of the enzyme reaction was described in the Experimental Section of the main text. The C-terminal modified amino acids listed in Table S3 were subjected to the reaction. The underlined compounds were recognized by aminolysin-*A*. The total ion chromatograms (TICs) of the reaction mixtures and MS spectra of products, obtained by the use of L-Phe-NH<sub>2</sub>, L-Phe-OMe, L-Phe-OEt, D-Phe-OMe, D-Phe-OBn, L-Leu-OBn, and D-Leu-OBn, were already shown in the Figure 3[A] of the main text and Figure S6s as typical examples of these experiments. Product identification for the others (underlined compounds in Table S3) is summarized in Table S4.

Supplementary Material (ESI) for Organic & Biomolecular Chemistry  
This journal is © The Royal Society of Chemistry 2011

**Table S3. List of tested amino acid derivatives for homo-peptide synthesis**

| Amino acid moieties | Types of derivatization of carboxyl group | Companies         | Amino acid moieties | Types of derivatization of carboxyl group | Companies               |
|---------------------|-------------------------------------------|-------------------|---------------------|-------------------------------------------|-------------------------|
| L-Lys               | OMe                                       | SIGMA             | L-Ala               | NH <sub>2</sub>                           | novabiochem             |
|                     | OBzl                                      | BACHEM            |                     | OMe                                       | ALDRICH                 |
| L-Arg               | OMe                                       | BACHEM            |                     | OBzl                                      | Tokyo Chemical Industry |
| L-His               | OMe                                       | ALDRICH           | D-Ala               | NH <sub>2</sub>                           | BACHEM                  |
| L-Ile               | OBzl                                      | BACHEM            |                     | OMe                                       | BACHEM                  |
| L-Phe               | NH <sub>2</sub>                           | novabiochem       |                     | OBzl                                      | BACHEM                  |
|                     | OMe                                       | ALDRICH           |                     | Or-butyl                                  | BACHEM                  |
|                     | OEt                                       | ALDRICH           | L-Met               | OMe                                       | SIGMA                   |
| D-Phe               | OMe                                       | ALDRICH           | L-Pro               | OMe                                       | ALDRICH                 |
|                     | OBzl                                      | BACHEM            |                     | OBzl                                      | BACHEM                  |
| L-Leu               | <u>NH<sub>2</sub></u>                     | novabiochem       | D-Pro               | OBzl                                      | BACHEM                  |
|                     | <u>OMe</u>                                | ALDRICH           | L-Asp               | O(Me) <sub>2</sub>                        | ALDRICH                 |
|                     | <u>OEt</u>                                | BACHEM            |                     | OBzl                                      | BACHEM                  |
|                     | <u>OBzl</u>                               | PEPTIDE INSTITUTE | D-Asp               | OBzl                                      | BACHEM                  |
|                     | Or-butyl                                  | SIGMA             | L-Glu               | O(Et) <sub>2</sub>                        | ALDRICH                 |
|                     | Oallyl                                    | SIGMA             |                     | OBzl                                      | BACHEM                  |
| D-Leu               | OBzl                                      | BACHEM            | D-Glu               | OBzl                                      | BACHEM                  |
| L-Ile               | <u>OBzl</u>                               | BACHEM            | L-Thr               | OMe                                       | SIGMA                   |
| D-Ile               | OBzl                                      | BACHEM            |                     | OBzl                                      | novabiochem             |
| L-Trp               | <u>OBzl</u>                               | BACHEM            | D-Thr               | OBzl                                      | BACHEM                  |
|                     | <u>OMe</u>                                | ALDRICH           | L-Gln               | NH <sub>2</sub>                           | BACHEM                  |
| D-Trp               | <u>OBzl</u>                               | BACHEM            | D-Gln               | NH <sub>2</sub>                           | BACHEM                  |
| L-Cys               | OMe                                       | ALDRICH           | L-Tyr               | <u>NH<sub>2</sub></u>                     | novabiochem             |
| L-Asn               | OMe                                       | BACHEM            |                     | <u>OMe</u>                                | ALDRICH                 |
| L-Val               | OMe                                       | ALDRICH           |                     | <u>OBzl</u>                               | BACHEM                  |
|                     | OBzl                                      | BACHEM            | D-Tyr               | OBzl                                      | BACHEM                  |
| D-Val               | OBzl                                      | BACHEM            | Gly                 | OMe                                       | ALDRICH                 |
|                     |                                           |                   |                     | OBzl                                      | SIGMA                   |
|                     |                                           |                   | L-Ser               | OMe                                       | ALDRICH                 |
|                     |                                           |                   |                     | OBzl                                      | BACHEM                  |
|                     |                                           |                   | D-Ser               | OBzl                                      | BACHEM                  |

\*The underlined compounds were recognized by aminolysin-A.

Supplementary Material (ESI) for Organic & Biomolecular Chemistry  
**Table S4. C-terminal modified amino acids recognized by aminolysin A**  
 Molecules (© The Royal Society of Chemistry 2011)

| Substrates            | Products <sup>1)</sup>      | Retention time (min.) | Observed $m/z$ , [M+H] <sup>+</sup> |
|-----------------------|-----------------------------|-----------------------|-------------------------------------|
| L-Ile-OBn             | Cyclo (Ile-Ile)             | 25.8                  | 227.2                               |
|                       | Ile-Ile-OBn                 | 33.6                  | 335.3                               |
|                       | Ile-Ile-Ile-OBn             | 37.8                  | 448.2                               |
| L-Leu-OMe             | Cyclo (Leu-Leu)             | 26.6                  | 227.2                               |
| L-Leu-OEt             | Cyclo (Leu -Leu)            | 26.6                  | 227.2                               |
| L-Leu-NH <sub>2</sub> | Leu-Leu-Leu-NH <sub>2</sub> | 23.3                  | 357.2                               |
|                       | Cyclo (Leu -Leu)            | 26.6                  | 227.2                               |
| L-Trp-OMe             | Trp-Trp                     | 25.3                  | 391.2                               |
|                       | Cyclo (Trp-Trp)             | 26.8                  | 373.1                               |
|                       | Trp-Trp-Trp                 | 30.4                  | 577.2                               |
|                       | Trp-Trp-Trp-OMe             | 34.0                  | 591.2                               |
| L-Trp-OBn             | Cyclo (Trp-Trp)             | 26.8                  | 373.1                               |
| D-Trp-OBn             | Cyclo (DTrp-DTrp)           | 26.8                  | 373.1                               |
| L-Met-OMe             | Met-Met                     | 9.4                   | 281.1                               |
|                       | Cyclo (Met-Met)             | 20.6                  | 263.2                               |
| L-Tyr-NH <sub>2</sub> | Tyr-Tyr                     | 10.0                  | 345.2                               |
|                       | Cyclo (Tyr-Tyr)             | 14.7                  | 327.2                               |
|                       | Tyr-Tyr-Tyr-NH <sub>2</sub> | 16.6                  | 507.3                               |
|                       | Tyr-Tyr-Tyr                 | 19.1                  | 508.3                               |
| L-Tyr-OBn             | Cyclo (Tyr-Tyr)             | 14.7                  | 327.2                               |
|                       | Tyr-Tyr-Tyr                 | 19.1                  | 508.3                               |
| L-Tyr-OMe             | Tyr-Tyr                     | 10.2                  | 345.2                               |
|                       | Cyclo (Tyr-Tyr)             | 14.9                  | 327.1                               |
|                       | Tyr-Tyr-Tyr                 | 19.1                  | 508.3                               |

1) Speculated compounds judged from its observed  $m/z$  and retention time on HPLC/MS analysis were shown.

Section-5. Confirmation of non-enzymatic cyclization of  $D$ -F- $D$ -F-OBn to give  $cyclo(D$ -F- $D$ -F)

In order to clarify the reaction mechanism to give cyclic dipeptides, we tried to isolate the intermediate dipeptide ester and then subject it to enzymatic and non-enzymatic treatments. In this experiment,  $D$ -F-OBn was selected as the model substrate because of its ability to give a linear dipeptide ester and cyclic dipeptide under our reaction system (see Figure S6-4). The reaction mixture (1000  $\mu$ l) was composed of 0.1 M phosphate buffer (pH 8.0), 10 mM  $D$ -F-OBn, 100  $\mu$ g purified aminolysin-A, and 10% (v/v) DMSO. The reaction was performed at 21  $^{\circ}$ C (room temperature) for 6 h using a Capsule HF 120 centrifuge (TOMY, Tokyo, Japan), in which three separate reactions were conducted. It should be noted that the conditions, including a low reaction temperature and centrifugation, were effective for obtaining the final product  $cyclo(D$ -F- $D$ -F) as an insoluble pellet. After the reaction, the three separate reaction mixtures were combined and centrifuged, and the upper layer containing  $D$ -F- $D$ -F-OBn was subjected to preparative ODS HPLC with the gradient solvent system of MeOH/H<sub>2</sub>O to isolate 8.7  $\mu$ g of produced  $D$ -F- $D$ -F-OBn. The isolate was subjected to the following treatment. The reaction mixture (100  $\mu$ L) was composed of 0.1 M NaPi (pH 8.0), 50  $\mu$ M of isolated  $D$ -F- $D$ -F-OBn, and 10% (v/v) DMSO with or without 10  $\mu$ g of aminolysin-A. The reaction was conducted at 50  $^{\circ}$ C for 6 h followed by the addition of 100  $\mu$ L of MeOH for quenching. After centrifugation, 10  $\mu$ L of the supernatant was subjected to a UPLC/MS analysis, for which the ACQUITY Ultra Performance LC<sup>®</sup> System (Waters) connected to the API 2000 LC/MS/MS System (Applied Biosystems) was used. In this experiment, selected ion monitoring was used for the detection of the substrate,  $D$ -F- $D$ -F-OBn; the putative products,  $cyclo(D$ -F- $D$ -F); and the linear dipeptide,  $D$ -F- $D$ -F. The column used was an ACQUITY UPLC BEH C18 (1.7  $\mu$ m, 2.1 x 50 mm). The mobile phase was water containing 0.1% (v/v) HCOOH (A) and MeOH containing 0.1% (v/v) HCOOH (B) at a flow rate of 0.3 ml/min. The LC condition was 20% B during 0–2 min and a linear increase from 20% to 65% B from 2 min to 10 min, while the flow was diverted from the mass spectrometer to the waste during 0–1.5 min. The results are shown in Figure S7. Apparently,  $D$ -F- $D$ -F-OBn was non-enzymatically converted to  $cyclo(D$ -F- $D$ -F). From this observation, we concluded that the cyclization (intramolecular aminolysis) of the intermediate dipeptide ester took place in a non-enzymatic manner.

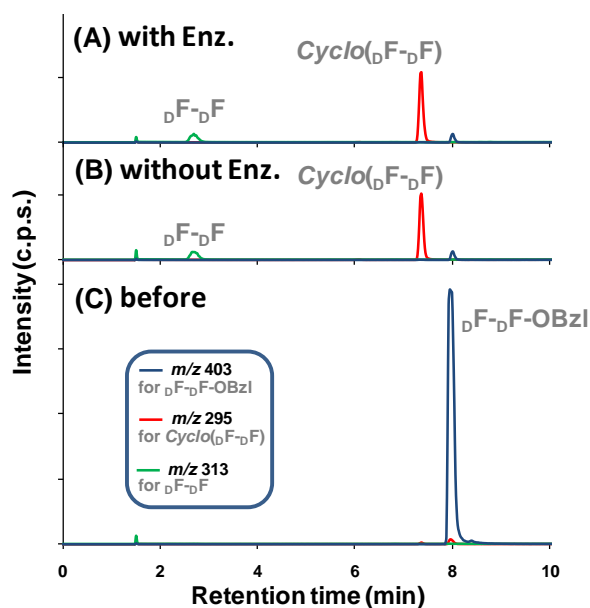

**Figure S7. Non-enzymatic intramolecular aminolysis of  $D$ -F- $D$ -F-OBn to give  $cyclo(D$ -F- $D$ -F).** (A) 50  $\mu$ M of  $D$ -F- $D$ -F-OBn was treated at 50 $^{\circ}$ C for 6 h with 10  $\mu$ g of aminolysin-A. (B) Treated without aminolysin-A. (C)  $D$ -F- $D$ -F-OBn as substrate (before the above treatment).

## Section-6: Hetero-peptide synthesis

The procedure of the enzyme reaction was described in the Experimental Section of the main text. The free amines listed in Table S5 were subjected to the reaction. The underlined compounds were recognized by aminolysin-A to give L-Phe- and L-Met-containing dipeptides. Figure S8 shown the extracted ion chromatograms (XICs) for the synthesis of L-Met-containing dipeptides. The procedures for the construction of XICs were described in the Experimental section of the main text. LC elution programs for Figure S8 were following. The mobile phase was water containing 0.1 % (v/v) HCOOH (A) and MeOH containing 0.1 % (v/v) HCOOH (B) at a flow rate of 0.2 ml/ min. The LC condition was 5.0 % B during 0–5 min, a linear increase from 5.0–99 % B during 5–40 min, and 99% B during 40–45 min.

**Table S5.** List of tested free amines for hetero-peptide synthesis

| Compounds          | Companies | Compounds                                            | Company                      |
|--------------------|-----------|------------------------------------------------------|------------------------------|
| L-Lys              | WAKO      | (R)- $\alpha$ -Methylphenylalanine                   | NAGASE and CO., LTD. (Japan) |
| L-Arg              | WAKO      | (S)- $\alpha$ -Methylphenylalanine                   | NAGASE and CO., LTD. (Japan) |
| L-His              | WAKO      | (R)- $\alpha$ -Methyl-3-nitrophenylalanine           | NAGASE and CO., LTD. (Japan) |
| D-His              | WAKO      | (S)- $\alpha$ -Methyl-3-nitrophenylalanine           | NAGASE and CO., LTD. (Japan) |
| <u>L-Ile</u>       | nacalai   | (S)- $\beta$ -(4-Bisphenyl)- $\alpha$ -methylalanine | NAGASE and CO., LTD. (Japan) |
| <u>L-Phe</u>       | WAKO      | (S)-4-Bromo- $\alpha$ -methylphenylalanine           | NAGASE and CO., LTD. (Japan) |
| <u>D-Phe</u>       | BACHEM    | (S)-4-Iodo- $\alpha$ -methylphenylalanine            | NAGASE and CO., LTD. (Japan) |
| <u>L-Leu</u>       | WAKO      | (R)- $\alpha$ -Methyltyrosine                        | NAGASE and CO., LTD. (Japan) |
| <u>D-Leu</u>       | ALDRICH   | (S)- $\alpha$ -Methyltyrosine                        | NAGASE and CO., LTD. (Japan) |
| <u>L-Trp</u>       | WAKO      | <u>(R)-<math>\alpha</math>-Allylglycine</u>          | NAGASE and CO., LTD. (Japan) |
| <u>D-Trp</u>       | SIGMA     | <u>(S)-<math>\alpha</math>-Allylglycine</u>          | NAGASE and CO., LTD. (Japan) |
| L-Ala              | WAKO      | <u>(R)-<math>\alpha</math>-Propargylglycine</u>      | NAGASE and CO., LTD. (Japan) |
| D-Ala              | WAKO      | (S)- $\alpha$ -Propargylglycine                      | NAGASE and CO., LTD. (Japan) |
| <u>L-Met</u>       | WAKO      | (R)- $\alpha$ -Methylleucine                         | NAGASE and CO., LTD. (Japan) |
| L-Pro              | nacalai   | (S)- $\alpha$ -Methylleucine                         | NAGASE and CO., LTD. (Japan) |
| L-Val              | WAKO      | <u>Puromycin aminonucleoside</u>                     | SIGMA ARDRICH                |
| L-Asp              | WAKO      |                                                      |                              |
| L-Glu              | WAKO      |                                                      |                              |
| L-Thr              | nacalai   |                                                      |                              |
| <u>D-Thr</u>       | SIGMA     |                                                      |                              |
| L-Gln              | WAKO      |                                                      |                              |
| D-Gln              | SIGMA     |                                                      |                              |
| <u>L-Tyr</u>       | WAKO      |                                                      |                              |
| <u>D-Tyr</u>       | ALDRICH   |                                                      |                              |
| Gly                | WAKO      |                                                      |                              |
| L-Ser              | WAKO      |                                                      |                              |
| L-Cys              | SIGMA     |                                                      |                              |
| D-Cys              | WAKO      |                                                      |                              |
| L-Asn              | WAKO      |                                                      |                              |
| D-Asn              | WAKO      |                                                      |                              |
| <u>D-alpha-Ala</u> | WAKO      |                                                      |                              |

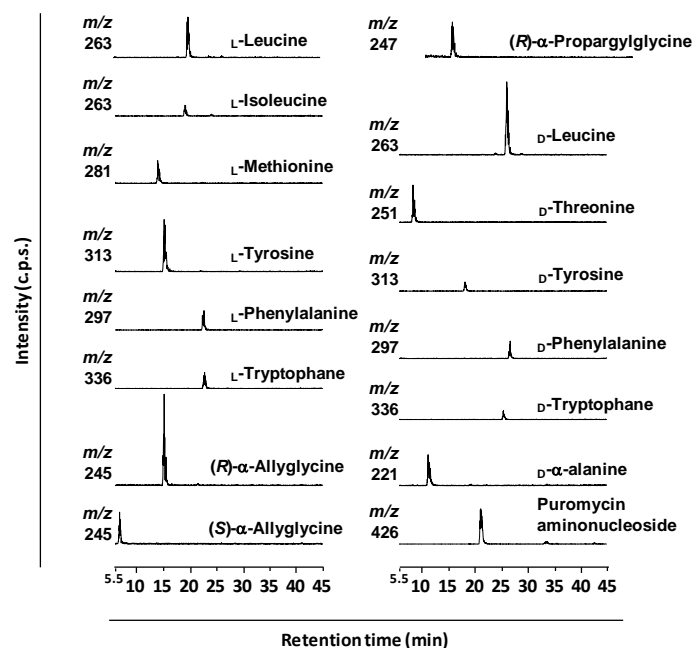

Figure S8. Methionine-containing dipeptide synthesis

## Section-7. Puromycin analogue synthesis

### 7-1: MS/MS analysis of synthesized puromycin analogues (X-PANs) and authentic puromycin (Figure 4 of the main text)

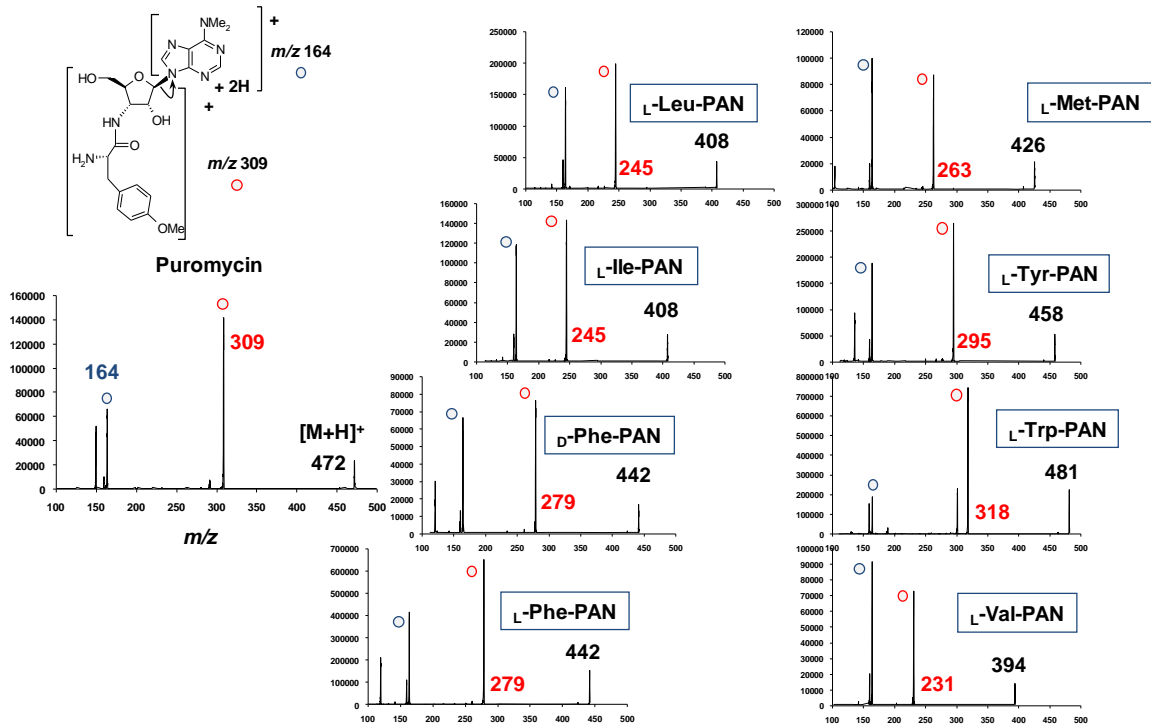

Figure S9. MS/MS spectra of puromycin and synthesized puromycin analogues (X-PANs) corresponding to Figure 4[A] of the main text

Supplemental Material (ESI) for Organic & Biomolecular Chemistry  
This journal is (c) The Royal Society of Chemistry 2011

## 7-2. MRM quantification of synthesized puromycin analogues (X-PANs) as a substitute for authentic puromycin (Table 1, 2, and figure 4,5 of main text)

The MS/MS spectrum of the authentic puromycin was shown in Figure S9. As shown, 2 ions corresponding to  $m/z$  309 and  $m/z$  164 were characteristic fragmentation ions of puromycin skeleton. Therefore, we created the 2 kinds of MRM transition sets, in those the experimental parameters were optimized using authentic puromycin. The MRM transitions (Q1>Q3) for each compounds was shown in the main text. For the quantification of each X-PAN as substitute for puromycin, MRM transition set as " $m/z$  of precursor ions" > " $m/z$  of fragmentation ions corresponding to  $m/z$  309 from puromycin" was used (see Figure S9).
